# Supplementary material for: The Framework for Assessing Changes To Sea-level (FACTS) v1.0-rc: A platform for characterizing parametric and structural uncertainty in future global, relative, and extreme sea-level change
Source: Copernicus journal article supplement (doi:10.5194/egusphere-2023-14), 2023-01-26
Supplement: Supplementary file [file egusphere-2023-14-AC4-supplement.pdf]

The authors present the FACTS framework to probabilistically estimate future sea level rise, globally and regionally. The framework aims to make it possible to seamlessly exchange individual drivers of global sea level rise so structural uncertainty can be explored. The presented work stands out as it underpins several authoritative sea level assessments, of which the most prominent is the IPCC AR6 WG1 assessment.

Due to this special position of FACTS, usability and replicability is a key concern. I therefore split this review into two parts: part one is on the scientific aspects and clarity. My comments here are mainly on clarification and better explanation because the method is a continuation of established works and because the AR6 methodology is fixed and I see a major function of the manuscript to document that methodology. Part two is on usability and replicability: readers should be able to replicate AR6 sea level numbers with the manuscript and the code at hand without being experts in specific high performance computing environments. I tried but failed. (I followed the rather succinct "Quick Start" documentation.) I propose improvements to be made to the manuscript and to the code to overcome this. Only if I (as an example user) succeed in a "replication of the AR6 approach entirely within FACTS " (stated in line 72-73) the work can reach its full potential and follow its aspiration to become a "larger-scale community project" (line 505).

We thank the reviewer for their comments.

We should clarify that the goal of the paper is to document FACTS 1.0, not document the production of the AR6 sea level projections. While much of what we describe provides useful detail for interpreting how AR6 produced its projections, FACTS development began well before it became the preferred tool for AR6, and continued after the completion of AR6. A number of modeling steps that were done via offline coupling (e.g., chapter 7 produced FaIR projections, which were handed off to the emulandice and LARMIP emulators to produce land ice time series, which were then taken as input to FACTS modules alongside the temperature and ocean heat content trajectories) are now done through coupling within the FACTS framework. Minor numerical differences are unsurprising, but the output for individual modules all agree with the results presented in AR6 within 0.01 m rounding errors, as we will present in the revision:

**Table A1.** GMSL Component Projections for 2100 compared to AR6

| Component          | Label                           | SSP1-2.6          | SSP2-4.5         | SSP5-8.5         |
|--------------------|---------------------------------|-------------------|------------------|------------------|
| Glaciers           | emulandice/glaciers             | 0.09 (0.07–0.11)  | 0.12 (0.10–0.14) | 0.18 (0.15–0.20) |
| Glaciers           | AR6 emulated (9.4)              | 0.08 (0.06–0.10)  | 0.12 (0.09–0.14) | 0.17 (0.14–0.20) |
| Glaciers           | ipccar5/glaciers (GMIP2)        | 0.09 (0.06–0.13)  | 0.12 (0.08–0.16) | 0.16 (0.11–0.22) |
| Glaciers           | GlacierMIP parametric fit (9.4) | 0.10 (0.08–0.13)  | 0.13 (0.10–0.17) | 0.17 (0.12–0.22) |
| Antarctica         | bamber19/icesheets              | 0.10 (-0.01–0.26) | —                | 0.20 (0.02–0.57) |
| Antarctica         | AR6 SEJ (9.8)                   | 0.09 (-0.01–0.25) | —                | 0.21 (0.02–0.56) |
| Antarctica         | deconto21/AIS                   | 0.08 (0.06–0.11)  | 0.09 (0.07–0.11) | 0.34 (0.19–0.53) |
| Antarctica         | AR6 MICI (9.3)                  | 0.08 (0.06–0.12)  | 0.09 (0.07–0.11) | 0.34 (0.19–0.53) |
| Antarctica         | emulandice/AIS                  | 0.08 (0.03–0.14)  | 0.08 (0.03–0.14) | 0.08 (0.03–0.14) |
| Antarctica         | AR6 emulated ISMIP6 (9.3)       | 0.09 (0.03–0.14)  | 0.09 (0.03–0.14) | 0.08 (0.03–0.14) |
| Antarctica         | larmip/AIS                      | 0.13 (0.05–0.26)  | 0.14 (0.05–0.29) | 0.15 (0.05–0.34) |
| Antarctica         | AR6 LARMIP-2 with SMB (9.3)     | 0.13 (0.06–0.27)  | 0.14 (0.06–0.29) | 0.15 (0.05–0.34) |
| Greenland          | bamber19/icesheets              | 0.13 (0.07–0.30)  | —                | 0.22 (0.10–0.59) |
| Greenland          | AR6 SEJ (9.8)                   | 0.13 (0.07–0.30)  | —                | 0.23 (0.10–0.59) |
| Greenland          | emulandice/GrIS                 | 0.05 (0.01–0.10)  | 0.08 (0.04–0.13) | 0.12 (0.08–0.18) |
| Greenland          | AR6 emulated ISMIP6 (9.2)       | 0.06 (0.01–0.10)  | 0.08 (0.04–0.13) | 0.13 (0.09–0.18) |
| Greenland          | FittedISMIP/GrIS                | 0.08 (0.06–0.10)  | 0.10 (0.08–0.12) | 0.14 (0.11–0.18) |
| Greenland          | AR6 parametric ISMIP fit (9.2)  | 0.08 (0.06–0.10)  | 0.10 (0.08–0.13) | 0.14 (0.11–0.18) |
| Land Water Storage | ssp/landwaterstorage            | 0.03 (0.02–0.04)  | 0.03 (0.02–0.04) | 0.03 (0.02–0.04) |
| Land Water Storage | AR6 land-water storage (9.9)    | 0.03 (0.01–0.04)  | 0.03 (0.01–0.04) | 0.03 (0.01–0.04) |
| Thermal Expansion  | tlm/sterodynamics               | 0.14 (0.11–0.17)  | 0.19 (0.15–0.23) | 0.29 (0.24–0.35) |
| Thermal Expansion  | AR6 thermal expansion (9.9)     | 0.14 (0.11–0.18)  | 0.20 (0.16–0.24) | 0.30 (0.24–0.36) |

Median (17th-83rd percentile) projections are shown relative to a 1995–2014 baseline. All are in m except for global mean surface air temperature (GSAT), which is in °C above a 1850–1900 baseline. For certain modules, projections for Representative Concentration Pathways 2.6, 4.5, and 8.5 are shown in lieu of those for the SSP scenarios. AR6 results taken from Tables 9.2, 9.3, 9.4, 9.8, and 9.9, as indicated by numbers in parentheses after label.

In addition, the AR6 presentation of sea-level rise projections is in an imprecise probability mode, described in AR6 WG1 9.6.3.2, in which results are summarized by p-boxes that encompass multiple alternative probability distributions. FACTS' job is to produce samples from multiple alternative probability distributions of sea level rise, not to prescribe a particular approach to how these distributions are summarized and combined. The particular historical, epistemological, and communicative rationale underlying the AR6 approaches are described in a separate manuscript (Kopp et al., in press; earlier preprint at <https://doi.org/10.1002/essoar.10511663.1>), and are not the subject of this manuscript. We believe some of the reviewer's questions about discrepancies between the numerical results in this paper and those in the manuscript relate to the difference between individual probability distributions (shown here) and p-boxes (as shown in WG1 Table 9.9, and other figures and tables in the chapter).

The distinction is illustrated by Fig. 1 in the pre-print linked above, and reproduced here:

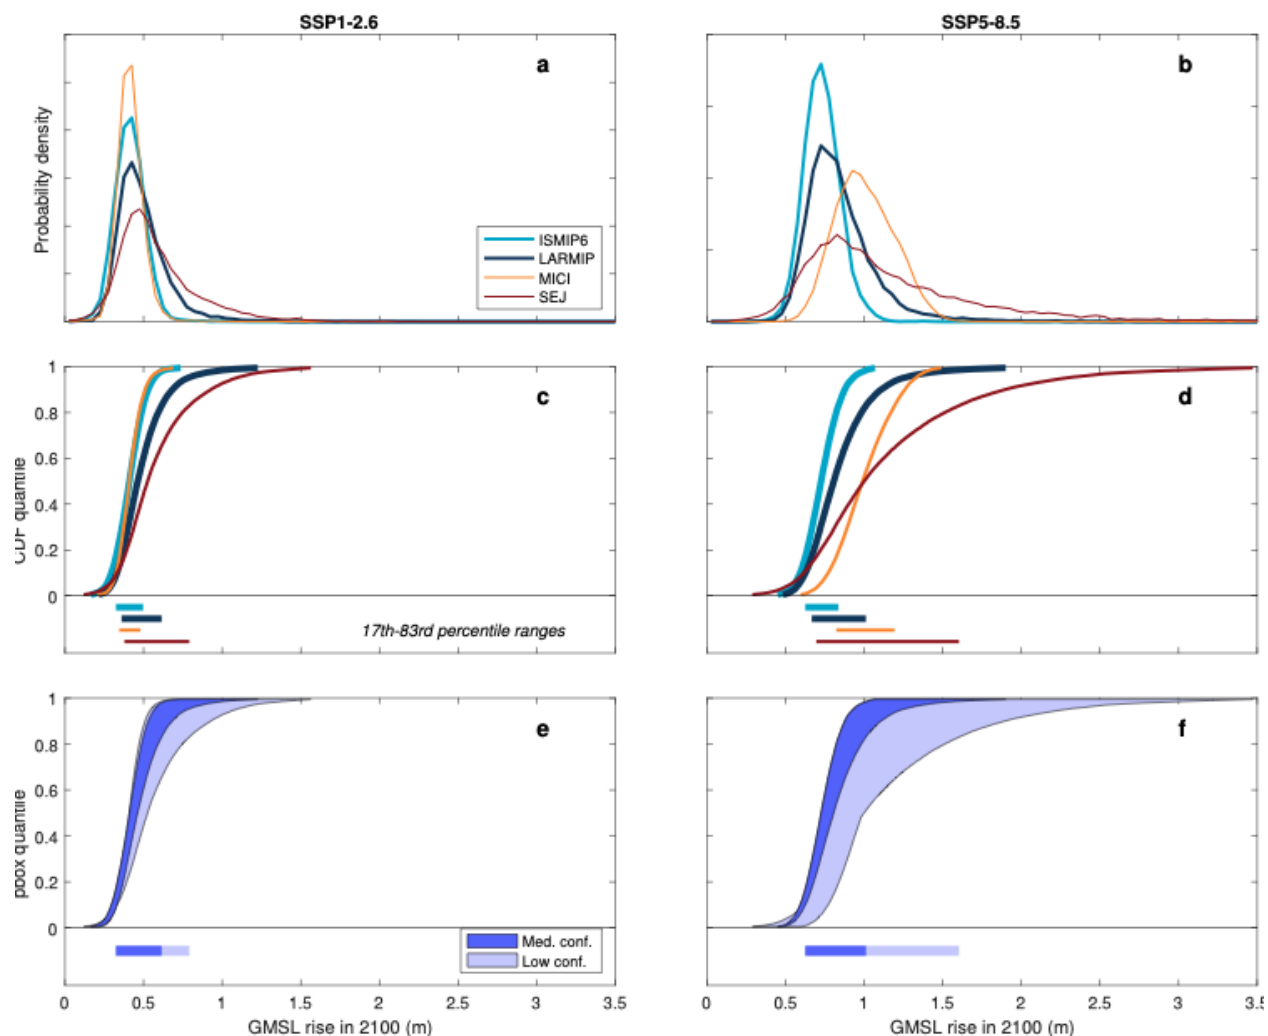

The first two rows illustrate individual probability distributions (corresponding to WF 1e, 2e, 3e, and 4 in the current manuscript) as (a,b) probability distribution functions and (c,d) cumulative distribution functions. The last row (e,f) represents how these distributions are summarized in AR6 by *medium confidence* and *low confidence* p-boxes. The results presented in the current manuscript and produced by FACTS correspond to the distributions shown in the top two rows; the results presented in AR6 correspond to the bottom row.

FACTS per se does not produce the final row, and cannot, since its basic mode of operation is to sample probability distributions corresponding to different workflows. Synthesizing these results in a summary form is necessarily a post-processing step. We will be adding Jupyter notebooks to the Github repo to facilitate this step, but this is not a core part of FACTS proper.

We also confused the reviewer by using the term ‘vertical land motion’ to refer to long-term vertical land motion, of the sort reflected in century-scale analysis of tide-gauge data.

Elastic deformation associated with contemporary land-ice and land-water mass redistribution is accounted for in the RSL projections via the static GRD fingerprints.

Part 1:

I have four points that need more clarity in my view.

1) It is not straightforward to understand how the IPCC AR6 numbers are derived from FACTS. It is described in L411ff, which is already part of the discussion section. The manuscript would profit to state upfront how the AR6 numbers are constructed within the manuscript, for example as part of sec 3.3 or as a separate section. I also advocate for stating the AR6 numbers directly within the manuscript (i.e. within tables 3 and 4), which would make comparison easier. For now I find close correspondence, but no replication of IPCC AR6 numbers (from WG1 Table 9.9). For replication I would expect the numbers to match. If not, I would at least expect a paragraph where the numbers are related and differences justified. Ideally the setup for AR6 replication (a "cookbook") would be prepared within the codebase so that the user does not have to manually infer the settings from the manuscript.

As noted above, we will add a table showing that the module output presented in the paper agrees with the AR6 table results within 0.01 m rounding errors. More substantial differences identified by the reviewer may be partially the result of confusing summary p-box distributions with the output of individual workflows; we have attempted to clarify this point by indicating which workflows are used for which p-box in Table 2.

2) VLM is now recognized as a key driver of relative sea level rise and thus impacts (i.e. Nicholls et al, 2021), but it does not get the necessary attention in the manuscript.

a) VLM estimation is based on Kopp et al. 2014, which uses a Gaussian process model to fit historical tide gauge data. The step from fitting to tide gauge data (yielding spatial fields of relative sea level as output) to estimating the VLM component is not clear to me even after reading the SI of Kopp et al. 2014. This needs additional explanation.

The model approximates VLM (and the geocentric sea level contribution of GIA) as the century-scale constant rate trend that remains after removing the global-mean signal, the regionally and temporally-correlated non-linear signal. The prior estimate of this trend is taken from a GIA model (ICE5G VM2-90), to which the estimate of the trend reverts (with added uncertainty) as one makes predictions at greater distances from the data.

b) To my knowledge the approach does not involve direct observations of VLM (i.e.

GNSS), where much progress has been seen for VLM estimation. For example, involving such measurements to correct tide gauge measurements for VLM crucially helped to close the sea level budget (Frederikse et al 2020). Can you justify the default choice of Kopp 2014?

The observational record of VLM remains relatively short in most of the world; the majority of GNSS stations at tide gauges were installed in the 21st century . The long-term VLM module assumes rates of VLM can be extrapolated forward at a constant rate through 2150. The tide-gauge based estimates, which average over a longer period, are better suited for this future than the available GNSS data in many regions. In addition, note that this module is intended to represent GIA in full, not just the GIA contribution to vertical land motion. The sea-surface height effect of GIA is incorporated into the estimated long-term trend based on tide-gauge analysis per Kopp et al., 2014, but would be neglected if only GNSS results were used.

In general, changes to VLM based on local knowledge are the most requested revision to the AR6 projections by stakeholders. This would likely be the case for any global analysis method.

c) Changes in contemporary ice mass loading affect not only the ocean water distribution (which I see included through the GRD fingerprints), but also VLM. GRD fingerprints are mentioned for ice sheets (I222), but the reference is more than 20 years old and it is not clear if newer works, especially these of Thomas Frederikse (2017, 2019, 2020) are represented and how and if they affect the VLM estimates of the presented work.

Elastic deformation (the 'D' of GRD) is included in the GRD fingerprints used in localizing the land-ice and land-water storage results. Mitrovica et al. (2001) is cited as a seminal paper that first incorporated the 'R' in GRD. (The 'G' and 'D' were modeled by Clark and Lingle, 1977). We have added a reference to Gomez et al. (2010), which provides a better historical presentation of the development of GRD theory, as well as detailed theoretical derivation. The understanding of elastic GRD physics has not changed substantially since then. (Our projections do not include viscoelastic effects, which recent work as shown on a century + timescale might be significant in low-viscosity regions like West Antarctica; e.g., Pan et al., 2021) The computational approach used is described in Slangen et al. (2014), as cited. The Frederikse work cited deals with the detection of fingerprints in GRACE data and the interpretation of sea-level observations, not GRD projections.

d) VLM is independent of future warming, which could be said clearer (currently referred to as "constant trend", I285) and also stated as a caveat: future ice mass

loss is scenario dependent and will influence the VLM rate but it is not implemented in FACTS.

The deformation associated with future, scenario-dependent ice-mass loss (and changes in land-water storage) is incorporated into the GRD fingerprints applied to these components.

3) It is not clear to which baseline the individual contributions are referenced to. Though the authors mention Gregory et al. 2019, which did an excellent job on clarifying terminology, the reference frame is not stated explicitly for each component. The manuscript would profit from such explicit statements. Is the FACTS regional relative sea level rise N15 in Gregory et al. 2019? Are the components in the geocentric reference frame? Clarification on the reference frame will help scientists to add new modules.

We add a note: “Consistent with IPCC AR6, for existing sea-level component modules, the standard convention is that output is relative to the 19-year average of global-mean and/or relative sea level centered in the year 2005.”

4) FACTS only works for the standard RCP/SSP scenarios except for workflow 1e if I understand it correctly. This is different to sea level emulators and I understood it only late in the text. This should be made more prominent so readers can better contextualise this work.

This depends on the modules being used. All the modules listed in Table 3 with a label other than “static by SSP scenario” or “static by RCP scenario” can be used with any emissions scenario. This includes all the modules used for global sea level projections in the medium confidence workflows described in the paper (wf1e, wf1f, wf2e, wf2f), though not the deconto21 or bamber19 modules. For RSL projections, this is generally also true, though the tlm/sterodynamic module does require the identification of a SSP to use for calibrating the relationship between global-mean thermal expansion and ocean dynamic sea level. (This relationship can, however, be applied to temperature and ocean heat content output associated with any emissions scenario.)

Detailed comments (part 1):

I15-I18: can we include a non-US reference as well.

We now note: “Sea-level scenarios were also explored by the Dutch Ministerie van Verkeer en Waterstaat in 1986 (van der Kley, 1987).”

I29: introduce relative sea level rise and its definition (e.g Gregory et al. 2019)

Accepted, thank you.

I34: is relative sea level changes here the right term? So did Mitrovica already look into VLM influenced by West Antarctic ice loss or is it only about water mass redistribution?

Yes. Indeed, VLM influenced by West Antarctic ice loss was included in the original fingerprints published by Clark and Lingle 1977.

I38: this paragraph does not mention vertical land motion, a key component of local relative sea level rise.

We have replaced the reference to 'land subsidence' with a reference to 'vertical land motion.' Note that the 'D' of 'GRD' is solid-Earth deformation, i.e, a contributor to vertical land motion.

I47: "a single probability distribution"

Accepted, thank you.

I111: a word missing after MPI/OpenMP?

We have rephrased to say that tasks "can run on single or multiple cores, nodes, and threads."

I109-I142: Why this detailed description of RADICAL-Cybertools? It distracts from the story and does not help to get the code running. I would revise and shorten this and describe the environment in terminology understandable to sea level and climate scientists. See also part 2 of the review.

We have shortened this section somewhat, but this is paper is a description describing a modeling framework, and we believe it is important to describe the architectural underpinnings of the framework.

I145/Figure1: what do the abbreviations like WF1e in the integration and extreme sea level step mean? They are not explained here.

Added a note to the caption that 'WF' is the acronym for Workflow. Caption already referred reader to Table 2 for the modules making up each Workflow.

I167: "bring this formerly offline simulation within FACTS" is not good to understand. Please reformulate for clarity.

We now note: “In the case of `ipccar6/ismipemuicesheets` and `ipccar6/gmipemuglaciers`, climate output generated offline using FAIR by the AR6 Working Group 1 Chapter 7 authors was run offline through the `emulandice` emulator of Edwards et al. (2021), the output of which was then transferred to the FACTS modules as static data. Similarly, in the case of `ipccar6/larmipAIS`, the Chapter 7 climate output was run through the LARMIP-2 emulator of Levermann et al. (2020), then transferred to the FACTS module. (Details of both the `emulandice` and LARMIP-2 emulators are described below.) For replicability reasons, the original AR6 direct-sample version of the `emulandice` ISMIP6 and LARMIP modules (`ipccar6/ismipemuicesheets` and `ipccar6/larmipAIS`, respectively) are retained in FACTS 1.0, though their use is deprecated.... In FACTS 1.0, the `larmip` and `emulandice` modules bring the formerly offline `emulandice` and LARMIP-2 emulators into FACTS.”

I170: “demonstrate the ability”

Accepted, thank you.

I185: “an additional basal ice shelf melting” can this be more concrete with a number?

We now state: “16 state-of-the-art ice-sheet models performed experiments in which they applied a constant additional basal ice shelf melt forcing of 8 m/yr underneath each of five distinct regions of the Antarctic coast for 200 years.”

I187: convoluted→convolved?

Accepted, thank you.

I187-192: I would reorder the sentences so the order represents the causal chain from global mean temperature change to ice loss. As of now a bit hard to follow.

We now state: “To apply these linear response functions to generate new projections, global mean temperature projections are scaled and time-delayed in according with the response of the CMIP6 climate models' subsurface oceanic warming to surface warming. This subsurface warming signal is then scaled with the observed sensitivities of basal melting to warming outside of the Antarctic ice shelf cavities. The resulting basal melt forcing is convolved with the linear response function to project the dynamic response of the Antarctic ice sheet.”



I198ff: it is not clear to me from this paragraph if the authors implement a method already present in the AR5 or if they create a method in FACTS to capture the numbers of 2005-2010 observed and 2100 projected ice loss of the AR5.

We now clarify: “This is done within the `larmip` module using the same approach as applied by the IPCC Fifth Assessment Report (Church et al., 2013) and in the `ipccar5/icesheets` modules, described below.”

I204: “a negative rate is added”: can you say this more precisely?

We now state: “a negative rate term that scales with accumulation is added to account for the feedback between enhanced accumulation and dynamic ice discharge.”

I219: `appled`→ `applied`

Accepted, thank you.

I219 “were applied in the context of the corresponding” is not clear. Do you mean “the RCP scenario projections were treated as SSP scenario projections”?

Yes, as noted, “e.g., RCP2.6 projections from DeConto et al. (2021) applied to SSP1-2.6.”

L220: fingerprints precomputed, do they include the ocean bottom deformation part?

Yes, that is the ‘D’ part of ‘GRD’.

I221: “includes”→“include”

Accepted, thank you.

I221ff: do the GRD fingerprints only influence the geocentric part of relative sea level rise or also VLM?

The ‘D’ in ‘GRD’ refers to the deformation of the solid Earth, i.e., land motion. We now clarify: “These fingerprints include both gravitational and rotational effects on sea-surface height, as well as deformational effects on sea-floor height.”

I227: “of 2015-2100 glacier loss” or similar;

Accepted, thank you.

L227: which RCP scenarios are used?

We now state: “under RCP 2.6 and 8.5, and in some cases also under RCP 4.5 and 6.0”.

I233:  $f_l(t)^p$ : using  $f$  for the parameter here is confusing, it reads like a function, maybe write " $f \times l(t)$ " or choose another parameter name.

We have added a multiplication sign. We are sticking to the original symbology for consistency with the AR5 supplementary material.

I235: “a set of glacier models”: can you be more specific?

We now state: “ a set of four glacier models (Giesen and Oerlemans, 2013; Marzeion et al., 2012; Radić et al., 2014; Slangen and Van De Wal, 2011).”

I233ff: if readers do not cross this paragraph, they do not understand that the method used in the AR6 is named `ipccar5`, but uses an updated calibration.

We add a footnote to Table 1: “The `ipccar5/glaciers` module includes, in addition to the original IPCC Fifth Assessment Report calibration, recalibrations to GlacierMIP and GlacierMIP2 (Hock et al., 2019; Marzeion et al., 2020). The GlacierMIP2 recalibration is used in IPCC AR6 and in this paper and is denoted by a parenthetical ‘(GMIP2)’ in this paper’s tables.”

I246ff: are these GRD fingerprints?

Yes, clarified.

I251: what does “`tlm`” abbreviate?

‘`Tlm`’ abbreviates ‘two-layer model’, which describes the representation of temperature (from Geoffroy et al., 2013) used in the configuration of FaIR. We now note: “(As noted

above, fair/temperature is run using a two-layer model representation of the forcing/temperature coupling, from whence comes the abbreviation 't1m.')

I259: where is the dedrifting and regridding documented to reproduce the work?

These are described in the supplemental material to IPCC AR6 WG1 ch. 9. Now noted.

I264: "is then projected"

Accepted, thank you.

I266: "projects global mean thermosteric sea-level rise, taking as input ... global mean thermosteric sea-level rise ..." is confusing to read. I suggest to revise this sentence.

We clarify: "As described in Church et al. (2013)}, the ipccar5/thermalexpansion module projects the distribution of global mean thermosteric sea-level rise. It is calibrated to the time-dependent mean and standard deviation of the global mean thermosteric sea-level rise simulated by a multi-model ensemble."

I283ff: learning here that all earlier described components do not include VLM, so they do not output relative rise. It would be good to make this explicit before. It would be also good to say on which reference system all the other components work.

This is an unclear statement. The VLM module provides long-term VLM (and SSH change) from sources unrelated to contemporary land ice and land water redistribution. VLM associated with contemporary GRD effects are included in the GRD fingerprints. Now clarified. "Because the statistical model is constructed to extract a century-scale, climate-uncorrelated trend, there should be minimal double-counting of the deformational effects associated with recent land-ice mass loss and land-water redistribution. Vertical land motion associated with future land-ice mass loss and land-water redistribution is incorporated into the GRD projections of those components' respective modules."

L285: "constant trend": this means that future VLM is independent of future warming. Good to say this more explicitly.

Now clarified, per above.

I307: “Below the support” is hard to understand. Rephrase.

Rephrased as “Below the threshold of the Generalized Pareto Distribution.”

I314: “, with the substitution ...” this part of the sentence is hard to follow. Rephrase.

Now note: “As previously described in the description of the IPCC AR6 land-ice modules, in FACTS 1.0, we substitute of the temperature-driven `emulandice` and `larmip` modules for the approach of direct-sampling offline calculated values used in AR6.”

I323/Table1: module names `ipccar5/` and `ipccar6/` suggest that these are the ones used in the respective IPCC reports and the others not, but this is not the case following the text. This should be made clear in the caption.

We now note: “The `ipccar6` modules are direct-sample modules that were used only in IPCC AR6, and have been deprecated in FACTS 1.0 in favor of the `emulandice` and `larmip` modules. The `ipccar5` modules indicate the methods of described in (Church et al., 2013b), which in some cases and contexts were used by AR6, as described in (Fox-Kemper et al., 2021a) and Table 2. The `ipccar5/glaciers` module includes, in addition to the original IPCC Fifth Assessment Report calibration, recalibrations to GlacierMIP and GlacierMIP2 (Hock et al., 2019; Marzeion et al., 2020). The GlacierMIP2 recalibration is used in IPCC AR6 and in this paper and is denoted by a parenthetical ‘(GMIP2)’ in Tables 2 and 3.”

I327: can we give a more precise ref than just AR6? is it the unshaded cells in Table 9.9?. fullstop missing after the reference.

These are presented in numerous figures and numerous points in the chapter 9, Technical Summary, and SPM text. We have added “(for example, in the unshaded columns of Table 9.9)”.

I329/Table2: can we mark here which are the workflows for IPCC AR6 projections?

All 7 workflows are used by AR6. The particular p-boxes into which they are incorporated are described by the second paragraph of 2.4. We have added sub-headers to the develop to make the distinction between the *medium confidence* and *low confidence* workflows.

I331: is it the shaded last row of Table 9.9 AR6 WG1? Please reference.

Low confidence projections for SSP5-8.5 are the shaded last column of Table 9.9. Low confidence projections for SSP1-2.6 are also calculated and shown in certain figures and the text, but not presented in the table, as they are not substantially different from the *medium confidence* projections. We have added: “(for example, for SSP5-8.5, in the final column of Table 9.9)”.

I344/45: this means this is not a full emulator as FACTS cannot map global mean temperature to sea level rise. Depending on modules it is restricted to RCP/SSP scenarios.

FACTS is a framework, not an emulator, full-stop. Some modules are emulators. We have added some examples: “Some sea-level components modules (for example, the stereodynamic, ice sheet, and glacier modules used in workflows 1e, 1f, 2e, and 2f) take the FaIR-projected warming as an input. Others rely upon pre-computed projections, in some cases indexed by SSP or RCP emissions scenario (for example, the `deconto21` and `bamber19` ice sheet modules, and the deprecated `ipccar6` ice sheet and glacier modules) (Table 1).”

L346/Table3: the reader is left alone how these numbers compare to AR6. It would help to present the AR6 numbers again in Table 3/4 and discuss deviations in a paragraph.

We have added an appendix table showing the component-wise comparison to AR6. As can be seen, the FACTS 1.0 modules agree with results presented in AR6 within 0.01 m rounding errors. Discrepancies in total results can be slightly larger (on the order of 2-3 cm), consistent with a combination of rounding errors and sampling differences. (Note that AR6 used 20,000 samples per workflow, compared to the 2,000 per workflow in the results shown here.)

I357: cm→m

Accepted, thank you. Converted all sea level measurements to m for consistency.

I358: what are “Workflow pairs”?

We now clarify: “other emulandice/parametric Workflow pairs (i.e., 2e vs. 2f, and 3e vs. 3f)”

L372ff: please add a reference or an explanation of how the projection variance and interaction terms are calculated.

L405: explain TE

Thermal expansion. Added acronyms used in the figures to the caption.

L410: indeed I would see it as a major aim of the manuscript to replicate the main AR6 SLR projections.

This is not the primary aim of the authors. The aim of the manuscript is to describe an updated version of the modeling framework used in AR6. The exact scripts and data sets used for the AR6 analysis, while harder to use than FACTS 1.0, are available at <https://zenodo.org/record/6419954>. However, the newly added appendix tables show that FACTS 1.0 replicates the AR6 results, with minor differences in rounding and sampling.

L417: why the difference in how likely ranges are defined in this study compared to the rest of the IPCC AR6? Can the motivation be stated?.

This is beyond the scope of this paper, which is a model documentation paper. It is addressed in Kopp et al. (in press), which describes the sea-level uncertainty and ambiguity framing adopted by AR6. In brief, due to the deep uncertainty in sea-level projections, it is not possible to define precise probability ranges for outcomes, and the imprecise probabilities associated with the canonical IPCC definitions of likelihood are more appropriate.

L450: with some caveats: can you detail how this was translated?

AR6 states: that it is “mapping 2°C and 5°C stabilization scenarios to SSP1-2.6 and SSP5-8.5, respectively.” Referring to 2300 projections, it states that “Incorporating the SEJ-based ice-sheet projections of Bamber et al. (2019) for 2°C and 5°C stabilization scenarios yields 1.0–3.1 m for SSP1-2.6, and 2.4–6.3 m for SSP5-8.5, although because of the differences in scenarios, the SSP1-2.6 estimates may be overestimated and the SSP5-8.5 may be underestimated.” The same is already noted in the parenthetical in the text: “(though SSP1-2.6 most likely stabilizes below 2°C and SSP5-8.5 continues after 2100 to warm well above 5°C)”.

L474: "... for glaciers". I am not sure if this is generally true. Also glaciers have different timings of mass loss and disappearance in different world areas.

Since there are separate fingerprints for the RGI glacier regions, different timings of mass loss and disappearance do not invalidate the point. We have clarified: "Such a library approach is most appropriate for glaciers, as the glacier regions are geographically small enough that the shifts in the locus of mass loss within a region will not substantially modify that region's fingerprint."

Part 2:

The authors state in I71 that "FACTS 1.0 allows replication of the AR6 approach entirely

within FACTS", but I did not manage to make the code work on our computers. A main hurdle is the EnTK framework, which seems to be a specific framework only installed on certain supercomputers. Making this the default option to run FACTS hinders most scientists from replicating the work. I would therefore advise to change the default option for running FACTS to something generic many scientists are accustomed to. The authors provide a blueprint for such an option via a shell-script. I recommend making this the default option, or provide an alternative approach that can be used to reproduce AR6 numbers. In any case, the code should be cleared of hardcoded paths (e.g. using one configuration file shared across modules, or one per module with a consistent format across modules) and the authors should better describe how R should be installed to make the land ice emulators work. Also provide a description how to reproduce the AR6 numbers within the code/Readme. Ideally FACTS would in addition be provided as a package and could be installed using the usual tools (pip install or similar).

Concerning the manuscript, a clear reference to the AR6 numbers facts aims to replicate is missing. I expect these are Table 9.9 AR6 WG1. One solution would be to add them to Table 3 and 4 of the manuscript for direct comparison. I also recommend to provide computational cost per module (CPUh or similar) so potential users of the framework can judge if installation of the EnTK framework is necessary.

Detailed comments (part 2):

The code base includes a large number of dependencies, including heavy dependence on R. The authors provide some guidance in how to install the dependency, but it appears set up for their specific system, and not particularly user-friendly for the larger scientific community. In particular, library location and work directory are hard-coded in files disseminated throughout the project (in individual modules), as opposed to clearly indicated in a centralised configuration file.

For instance, to run the config provided in the doc:

```
cp -r experiments/coupling.ssp585/config.yml test
```

```
python3 runFACTS.py test
```

first fails because of missing files in modules/emulandice/shared (emulandice\_1.1.0.tar.gz and emulandice\_bundled\_dependencies.tgz). To produce them, it was necessary to set up a local R environment. This required among other things to edit:

modules/emulandice/shared/emulandice\_environment.sh : the line “module use /projects/community/modulefiles” had to be commented out.

modules/emulandice/shared/emulandice\_bundle\_dependencies.R:

```
packrat::set_opts(local.repos = c("/projects/community/R3.6_lib_workshop","."))
```

```
packrat::install_local('cli')
```

...

Needed to be replaced with more traditional:

```
install.packages('cli')
```

The authors did provide a README file in that directory with the mention:

“You will likely need to customize emulandice\_environment.sh and emulandice\_bundle\_dependencies.R based on your local environment.”

But we recommend the default to be setup for generic linux system, and “customization” reserved for use on the authors HPC, instead of (currently) the opposite.

This is a particular issue for the *emulandice* module, which was written in its current form in part to demonstrate how a FACTS module can wrap around independently developed code (in this case, the *emulandice* code of Edwards et al., 2021, <https://github.com/tamsinedwards/emulandice/>), even if written in a language other than Python. Of course, this does create some challenges, because the system needs to be set up to run this independently developed code.

A future version of FACTS will include a module package management system to facilitate this task. For the current version, we will improve the documentation for setting up emulandice.



To our knowledge, no other module set has similar issues.

To improve ease of use, we have (1) adopted defaults that work for a local Linux install, (2) created a single *emulandice\_build.sh* script, and (3) added instructions for configuring this particular module set to the Quick Start documentation.

The EnTK framework is the largest hurdle for use in the wider scientific community. The welcomed, alternative `--shellscript` option is experimental. We identify it as the main area to improve in order to disseminate the work.

runFACTS.py (issue with the EnTK framework)

The Mongo DB Server installation was smooth following the instructions provided by the authors. However, we quickly ran into issues with their EnTK framework when following the documentation:

```
python3 runFACTS.py experiments/dummy
```

```
“radical.entk.exceptions.EnTKError: Shell on target host failed: Cannot use new prompt,parsing failed”
```

The authors offer an alternative (<https://fact-sealevel.readthedocs.io/en/latest/quickstart.html#testing-a-module-with-a-shell-script>) where the code produces a shell script to bypass the EnTK framework, but with a strong disclaimer ("Performance is not guaranteed, and multi-module experiments are very likely not to work without customization.").

I tested the dummy setup and had to make minor modifications to runFACTS.py:

```
- print(' WORKDIR=/scratch/`whoami`/test.`date +%s`')  
  
+ print(' WORKDIR=local_scratch/`whoami`/test.`date +%s`')  
  
- print(' OUTPUTDIR=/scratch/`whoami`/test.`date +%s`/output')  
  
+ print(' OUTPUTDIR=local_scratch/`whoami`/test.`date +%s`/output')
```

And create the local\_scratch folder.

Then:

```
python3 runFACTS.py --shellscript experiments/dummy > test_dummy.sh
```

```
source test_dummy.sh
```

ran without error, but also produced no output.

I then tried the other configuration file indicated in the documentation, again with the `--shellscript` option:

```
mkdir test
```

```
cp -r experiments/coupling.ssp585/config.yml test
```

```
python3 runFACTS.py --shellscript > test_coupling.sh
```

```
source test_coupling.sh
```

I ran into issues related to library installation and hard-coded paths as described in the previous section. Once overcome, the script ran but new error messages appeared:

```
> cp: cannot create regular file 'local_scratch/reviewer/test.1681896393/output': No such file or directory
```

```
> cp: target 'local_scratch/reviewer/test.1681896393/test.GrIS1f.FittedISMIP.GrIS' is not a directory
```

(`local_scratch` is a local folder I created to replace the hard-coded, and authors-specific architecture `/scratch`)

Given the disclaimer provided by the authors on the experimental nature of the `--shellscript` option, I did not attempt to to run this further.

The `--shellscript` option is developed to facilitate testing of modules by module developers. EnTK handles process and file management for FACTS, a deliberate decision to facilitate the computational scalability of the code. We are unsurprised the attempt to use shellscript mode for a coupled run failed, as nothing in the shell script takes on the file management role fulfilled by EnTK. Developing an alternative coupling framework to EnTK is not in the development pathway for FACTS.

We regret the reviewer had challenges using EnTK. We were unable to replicate their challenges; the authors were able to install EnTK and FACTS from scratch in a vanilla Ubuntu Focal Docker container on a Mac laptop, as well as on a Windows laptop with WSL2, and get it running with no similar issues. See `scripts/vm_factsenvsetup.sh` for an example of how to do this. Unfortunately, given the limitations of the anonymous peer review process, it is challenging to help the reviewer diagnose why an install that works on

a vanilla virtual machine does not work on their system, but we would encourage them to try it out within a Docker container or VM if it does not work on their system.
